# Supplementary material for: Prussian blue nanocubes with an open framework structure coated with polyoxometalates as a highly sensitive platform for ascorbic acid detection in drinks/human urine
Source: Royal Society of Chemistry journal article supplement (doi:10.1039/c9nj01429b), 2019-01-01
Supplement: c9nj01429b1.pdf [file c9nj01429b1.pdf]

Supplemental Information submitted to *New journal of chemistry* for:

**Prussian blue nanocubes with open framework structure coated with polyoxometalates as a highly sensitive platform for ascorbic acid detection in drinks / human urine**

**Di Zhu,<sup>a</sup> Wei Zhu,<sup>a</sup> Jianjiao Xin,<sup>a,b</sup> Lichao Tan,<sup>a</sup> Xinming Wang,<sup>a</sup> Haijun Pang,<sup>a</sup> and Huiyuan Ma<sup>\*a</sup>**

<sup>a</sup>School of Materials Science and Engineering, College of Chemical and Environmental Engineering, Harbin University of Science and Technology, Harbin 150040, P. R. China

<sup>b</sup>College of Chemistry and Chemical Engineering, Qiqihar University, Qiqihar 161006, P. R. China

Corresponding author: Huiyuan Ma

E-mail address: mahy017@163.com

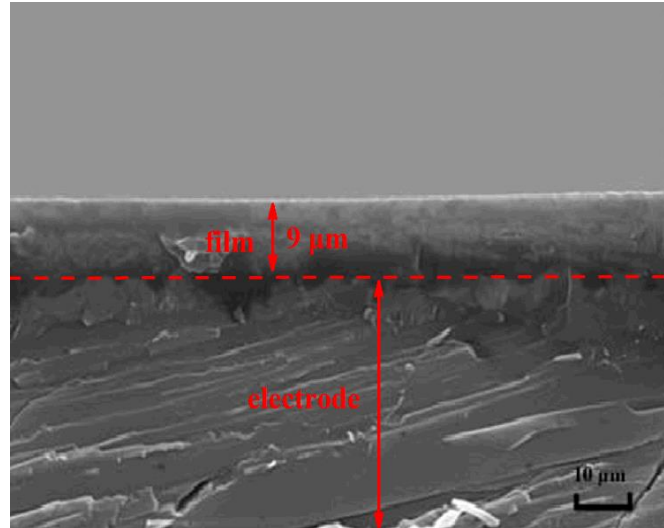

**Fig. S1** The cross section of the PB NCs@POMs nanocomposite electrode.

Fig. S2 describes the effect of the different scan rate for 5  $\mu\text{M}$  AA oxidation at the PB NCs@POMs nanocomposite in 0.1 M PBS (pH 7.0) at scan rates range from 20 to 200 mV/s. As Fig. S2(a) reveals, a linear dependence of peak currents vs. scan rate is shown by the consequences, indicating a surface adsorption control progress of the electron transfer response. The linear correlation equation of the  $I_{\text{Pa}}$  ( $\mu\text{A}$ ) vs.  $\nu$  ( $\text{mV s}^{-1}$ ) is:

$$I_{\text{Pa}} = 0.0161\nu + 1.09 \quad (R^2 = 0.992) \quad (1)$$

Besides, the linear relation of AA's oxidation peak potential ( $E_{\text{pa}}$ ) vs. the natural logarithm of scan rates ( $\log\nu$ ) is revealed by Fig. S2(b). The linear relationship is expressed as:

$$E_{\text{Pa}} = 0.181 \log\nu + 0.0633 \quad (R^2 = 0.996) \quad (2)$$

According to the Laviron theory for an adsorption controlled and totally irreversible electrode process [1,2,3],  $E_{\text{Pa}}$  is defined by the following equation.

$$E_{\text{Pa}} = E_0 - \left(\frac{2.3RT}{\alpha nF}\right) \left[ \log \frac{RTK_s}{\alpha nF} - \log\nu \right] \quad (3)$$

where  $\alpha$  is the transfer coefficient,  $K_s$  is the heterogeneous electrontransfer rate constant,  $n$  is the number of electrons transferred,  $\nu$  is the scan rate, and  $E_0$  is the formal standard potential. Other symbols have their usual meanings. Thus, the value of  $\alpha n$  can be easily calculated from the slope of  $E_{Pa}$  vs.  $\log \nu$ . In this system, the slope was found to be 0.181, taking  $T = 298$  K,  $R = 8.314$  J/K mol, and  $F = 96,485$  C/mol, the  $\alpha n$  was calculated to be 0.327. The  $\alpha$  value can be determined from the following equation [4,5,6]:

$$E_{Pa} - E_{Pa/2} = \frac{1.857RT}{\alpha F} = \frac{47.7}{\alpha} \text{ mV} \quad (4)$$

where  $E_{Pa}$  and  $E_{Pa/2}$  refers to the peak potential and the half-height, respectively. From this, the value of  $\alpha$  is estimated to be 0.209. Based on this result, the electron transfer number of AA oxidation on PB NCs@POMs nanocomposite is calculated to be 1.56 approximately which is close to two electrons' transfer progress.

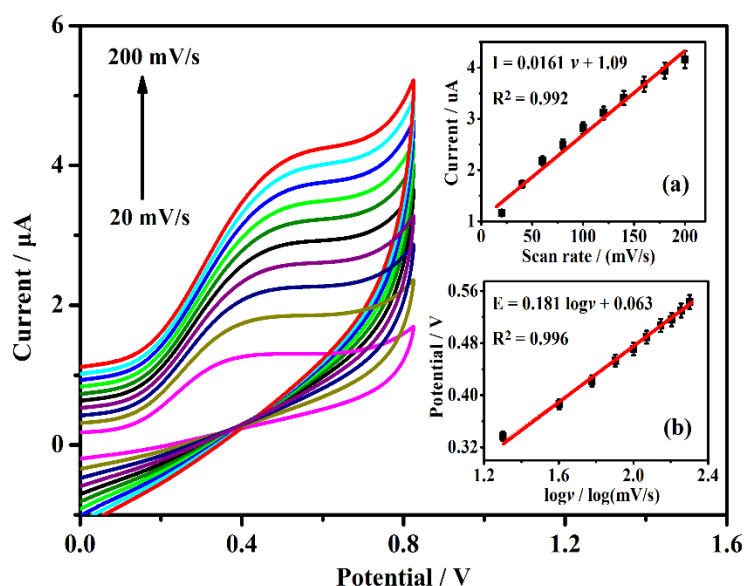

**Fig. S2** CVs of 5  $\mu\text{M}$  AA on the surface of PB NCs@POMs nanocomposite at various scan rates range from 20 to 200  $\text{mV s}^{-1}$  in 0.1 M PBS (pH 7.0). (a) Dependence of the oxidation peak current on scan rate. (b) Calibration plot of  $E_P$  vs.  $\log \nu$ .

1. Y. Temerk and H. Ibrahim, *Sens. Actuators B: Chem.*, 2016, **224**, 868-877.
2. J. B. Raof, R. Ojani, M. Baghayeri and F. Ahmadi, *Anal. Methods*, 2012, **4**, 1825-1832.
3. E. Laviron, *J. Electroanal. Chem.*, 1979, **101**, 19-28.
4. M. I. Sabela, T. Mpanza, S. Kanchi, D. Sharma and K. Bisetty, *Biosens. Bioelectron.*, 2016, **83**, 45-53.
5. Y. Temerk and H. Ibrahim, *Sens. Actuators B: Chem.*, 2016, **224**, 868-877.
6. J. Li, H. Feng, J. Li, J. Jiang, Y. Feng, L. He and D. Qian, *Electrochim. Acta*, **2015**, 176, 827-835.

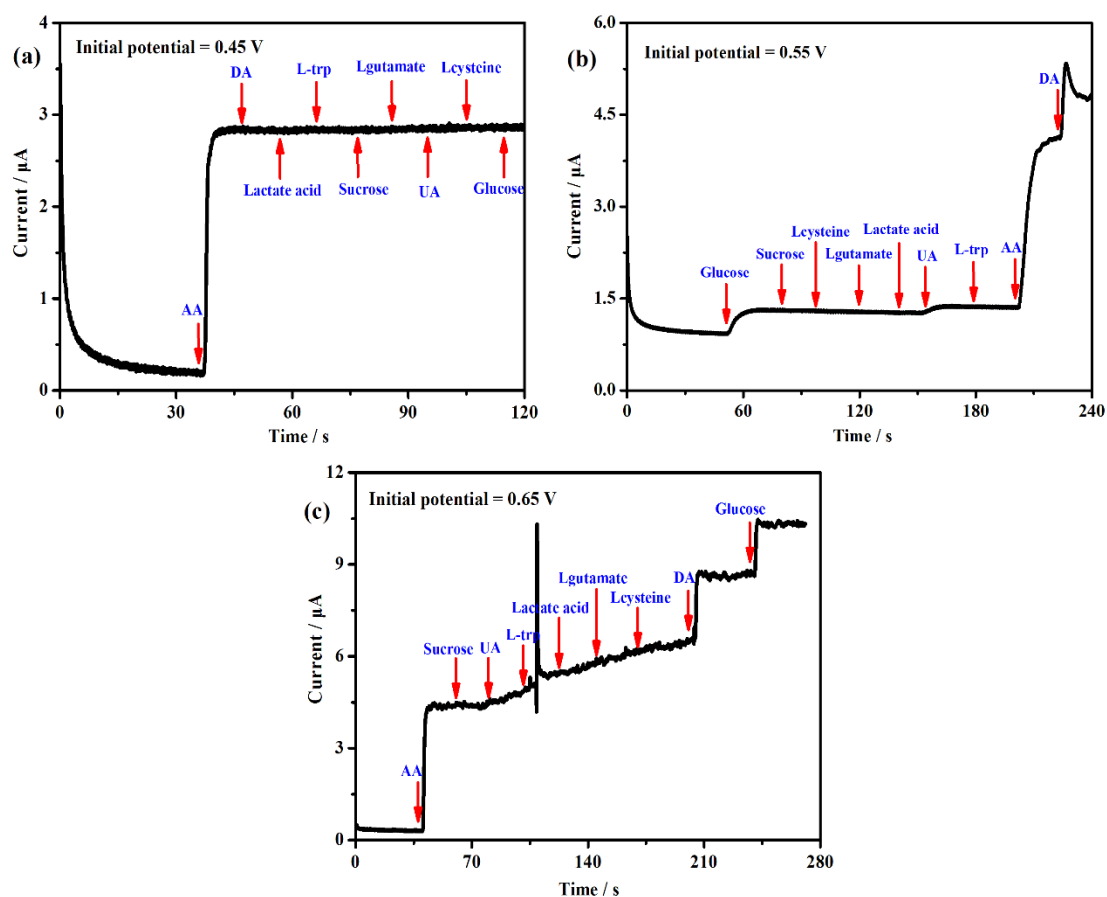

**Fig. S3** The i-t curves of the PB NCs@POMs nanocomposite containing 25  $\mu\text{M}$  of ascorbic acid, dopamine, glucose, uric acid, lactate acid, sucrose, l-gutamate, l-cysteine and l-tryptophan in 0.1 M PBS (pH 7.0) at different initial potentials of (a) 0.45V, (b) 0.55V, (c) 0.65V.

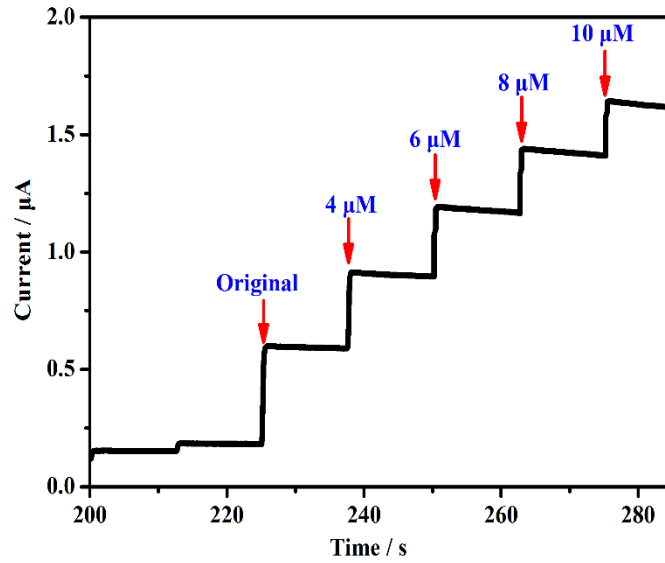

**Fig. S4** The *i-t* curve of the PB NCs@POMs nanocomposite for AA detection in drinks of orange juice.

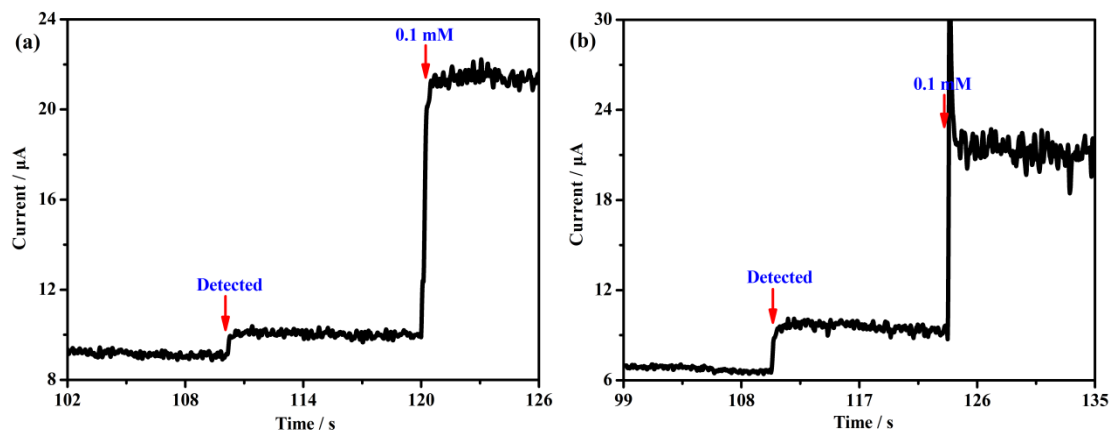

**Fig. S5** The *i-t* curve of the PB NCs@POMs nanocomposite for AA detection in human urine of (a) the first volunteer, and (b) the second volunteer.
